# Supplementary material for: Plasmid Dynamics of mcr-1-Positive Salmonella spp. in a General Hospital in China
Source: PubMed Central journal article supplement (PMC7782425; doi:10.3389/fmicb.2020.604710), 2020-12-22
Supplement: Image_1.pdf [file Image_1.pdf]

Marker S304 S438 S441 S520 S530 S585 Positive control

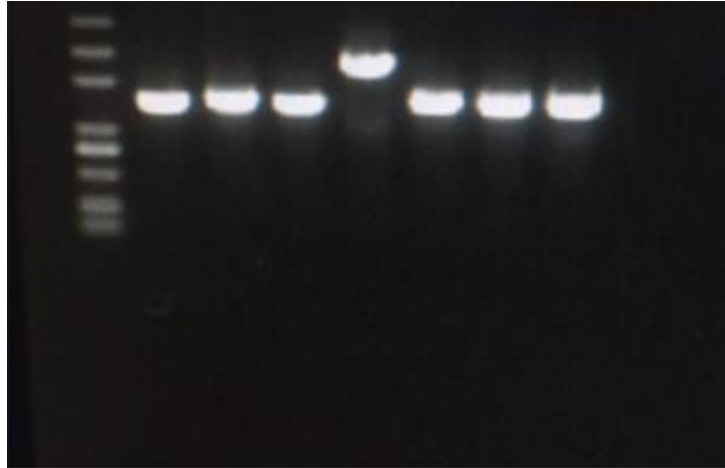

**Supplemental Figure 1:** PCR electrophoresis map of *mcr-1* positive strains
